# Supplementary material for: BRAF inhibitors promote intermediate BRAF(V600E) conformations and binary interactions with activated RAS
Source: PubMed Central journal article supplement — Sci Adv. 2019 Aug 14;5(8):eaav8463. doi: 10.1126/sciadv.aav8463 (PMC6693913; doi:10.1126/sciadv.aav8463), 2019-08-14
Supplement: aav8463_SM.pdf [file aav8463_SM.pdf]

## Supplementary Materials for

### **BRAF inhibitors promote intermediate BRAF(V600E) conformations and binary interactions with activated RAS**

Ruth Röck, Johanna E. Mayrhofer, Omar Torres-Quesada, Florian Enzler, Andrea Raffener, Philipp Raffener, Andreas Feichtner, Roland G. Huber, Shohei Koide, Susan S. Taylor, Jakob Troppmair, Eduard Stefan\*

\*Corresponding author. Email: [eduard.stefan@uibk.ac.at](mailto:eduard.stefan@uibk.ac.at)

Published 14 August 2019, *Sci. Adv.* **5**, eaav8463 (2019)  
DOI: 10.1126/sciadv.aav8463

#### **This PDF file includes:**

- Table S1. Used expression constructs, materials, and cell lines.
- Fig. S1. BRAF KinCon reporter activities and BRAF profiling.
- Fig. S2. Impact of defined kinase mutations on BRAF KinCon reporter dynamics.
- Fig. S3. BRAF KinCon reporter dynamics.
- Fig. S4. Complex formation of RAS:BRAF and PPI reporter dynamics.
- Fig. S5. Impact of vemurafenib on indicated PPIs.
- Fig. S6. Impact of BRAFi on binary RAS:RAF interactions.
- Fig. S7. PPI reporter dynamics and NS1 monobody IPs.
- Fig. S8. Validation of PPI dynamics and impact of RAFi on RAF conformations.

**Table S1. Used expression constructs, materials, and cell lines.**

| <b>Used constructs</b>          | <b>SOURCE</b>   | <b>IDENTIFIER</b> |
|---------------------------------|-----------------|-------------------|
| <b>PPI REPORTER</b>             |                 |                   |
| <b>RAF</b>                      |                 |                   |
| pcDNA3-BRAF-RLucF1              | This paper      | N/A               |
| pcDNA3-BRAF-RLucF2              | This paper      | N/A               |
| pcDNA3-BRAF(V600E)-RLucF1       | This paper      | N/A               |
| pcDNA3-BRAF(V600E)-RLucF2       | This paper      | N/A               |
| pcDNA3-RLucF1-BRAF              | This paper      | N/A               |
| pcDNA3-RLucF1-BRAF(V600E)       | This paper      | N/A               |
| pcDNA3-BRAF(R509H)-RLucF1       | This paper      | N/A               |
| pcDNA3-BRAF(R509H)-RLucF2       | This paper      | N/A               |
| pcDNA3-BRAF(R509H/V600E)-RLucF1 | This paper      | N/A               |
| pcDNA3-BRAF(R509H/V600E)-RLucF2 | This paper      | N/A               |
| pcDNA3-BRAF(R166A)-RLucF1       | This paper      | N/A               |
| pcDNA3-BRAF(R188A)-RLucF1       | This paper      | N/A               |
| pcDNA3-BRAF(R166A/R188A)-RLucF1 | This paper      | N/A               |
| pcDNA3-BRAF(R166A/V600E)-RLucF1 | This paper      | N/A               |
| pcDNA3-BRAF(R188A/V600E)-RLucF1 | This paper      | N/A               |
| pcDNA3-BRAF(417-766)-RLucF1     | This paper      | N/A               |
| pcDNA3-BRAF(417-766)-RLucF2     | This paper      | N/A               |
| pcDNA3-BRAF-RBD-RLucF1          | This paper      | N/A               |
| pcDNA3-BRAF-RBD-RLucF2          | This paper      | N/A               |
| pcDNA3-CRAF-RLucF1              | This paper      | N/A               |
| pcDNA3-CRAF-RLucF2              | This paper      | N/A               |
| pcDNA3-CRAF(R89A)-RLucF2        | This paper      | N/A               |
| pcDNA3-CRAF-RBD-RLucF1          | This paper      | N/A               |
| pcDNA3-CRAF-RBD-RLucF2          | This paper      | N/A               |
| pcDNA3-CRAF-NL                  | This paper      | N/A               |
| pcDNA3-CRAF(R89A)-NL            | This paper      | N/A               |
| <b>RAS</b>                      |                 |                   |
| pcDNA3-HRAS-RLucF1              | This paper      | N/A               |
| pcDNA3-HRAS-RLucF2              | This paper      | N/A               |
| pcDNA3-HRAS(G12V)-RLucF1        | This paper      | N/A               |
| pcDNA3-HRAS(G12V)-RLucF2        | This paper      | N/A               |
| pcDNA3-NRAS-RLucF1              | This paper      | N/A               |
| pcDNA3-NRAS-RLucF2              | This paper      | N/A               |
| pcDNA3-NRAS(G12V)-RLucF1        | This paper      | N/A               |
| pcDNA3-NRAS(G12V)-RLucF2        | This paper      | N/A               |
| pcDNA3-FLAG-HRAS                | This paper This | N/A               |
| pcDNA3-FLAG-HRAS(G12V)          | paper           | N/A               |
| pcDNA3-KRAS-RLucF1              | This paper      | N/A               |
| pcDNA3-KRAS-RLucF2              | This paper      | N/A               |
| pcDNA3-KRAS(G12V)-RLucF1        | This paper      | N/A               |
| pcDNA3-KRAS(G12V)-RLucF2        | This paper      | N/A               |
| <b>VARIOUS</b>                  |                 |                   |
| pcDNA3-R11b-RLucF1              | This paper      | N/A               |
| pcDNA3-R11b-RLucF2              | This paper      | N/A               |
| pcDNA3-MAX-RLucF2               | This paper      | N/A               |
| pcDNA3-RLuc                     | This paper      | N/A               |
| pcDNA3-YFP                      | This paper      | N/A               |

## KinCon REPORTER

### RAF

|                                         |            |     |
|-----------------------------------------|------------|-----|
| pcDNA3-RLucF1-BRAF-RLucF2               | This paper | N/A |
| pcDNA3-RLucF1-BRAF(G469A)-RLucF2        | This paper | N/A |
| pcDNA3-RLucF1-BRAF(D594G)-RLucF2        | This paper | N/A |
| pcDNA3-RLucF1-BRAF(V600E)-RLucF2        | This paper | N/A |
| pcDNA3-RLucF1-BRAF(V600K)-RLucF2        | This paper | N/A |
| pcDNA3-RLucF1-BRAF(K601E)-RLucF2        | This paper | N/A |
| pcDNA3-RLucF1-BRAF(T529I)-RLucF2        | This paper | N/A |
| pcDNA3-RLucF1-BRAF(T529M)-RLucF2        | This paper | N/A |
| pcDNA3-RLucF1-BRAF(S365A)-RLucF2        | This paper | N/A |
| pcDNA3-RLucF1-BRAF(S729A)-RLucF2        | This paper | N/A |
| pcDNA3-RLuc-F1-BRAF(S365A/V600E)-RLucF2 | This paper | N/A |
| pcDNA3-RLuc-F1-BRAF(S729A/V600E)-RLucF2 | This paper | N/A |
| pcDNA3-RLucF1-BRAF(T529I/V600E)-RLucF2  | This paper | N/A |
| pcDNA3-RLucF1-BRAF(T529M/V600E)-RLucF2  | This paper | N/A |

## PEPTIDE TAGGED PROTEINS

|                               |            |     |
|-------------------------------|------------|-----|
| pcDNA3-HA-BRAF                | This paper | N/A |
| pcDNA3-HA-BRAF(V600E)         | This paper | N/A |
| pcDNA3-FLAG-BRAF              | This paper | N/A |
| pcDNA3-FLAG-BRAF(V600E)       | This paper | N/A |
| pcDNA3-FLAG-BRAF(R509H)       | This paper | N/A |
| pcDNA3-FLAG-BRAF(R509H/V600E) | This paper | N/A |
| pcDNA3-FLAG-BRAF(R188A)       | This paper | N/A |
| pcDNA3-FLAG-BRAF(R188A/V600E) | This paper | N/A |
| pcDNA3-V5-CRAF                | This paper | N/A |
| pcDNA3-V5-CRAF(R89A)          | This paper | N/A |
| pcDNA3-HA-HRAS                | This paper | N/A |
| pcDNA3-HA-HRAS(G12V)          | This paper | N/A |
| pcDNA3-NS1-YFP                | This paper | N/A |
| pcDNA3-NS1neg-YFP             | This paper | N/A |

| ANITBODY                 | SOURCE            | IDENTIFIER                 |
|--------------------------|-------------------|----------------------------|
| C-RAF polyclonal         | Cell Signaling    | 9422S                      |
| B-RAF                    | Santa Cruz        | F-7: sc-5284, C-19: sc-166 |
| FLAG                     | Sigma-Aldrich     | F3165                      |
| GFP                      | Roche             | 11814460001                |
| HA-tag                   | Covance           | MMS-10P                    |
| mAB anti RLuc-F1         | Millipore         | MAB4410                    |
| mAB anti RLuc-F2         | Millipore         | MAB4400                    |
| pan RAS Antibody (RAS10) | Thermo Scientific | MA1-012X                   |
| P-ERK1/2 p44/P42 MAPK    | Cell Signaling    | 9101                       |
| ERK1/2 p44/p42 MAPK      | Cell Signaling    | 4696S                      |
| P-MEK1/2                 | Cell Signaling    | 9154                       |
| MEK1/2                   | Cell Signaling    | 4694                       |
| PKA-RIIb                 | BD Biosciences    | 610626                     |
| V5                       | Invitrogen        | R96025                     |

| REAGENTS                        | SOURCE                | IDENTIFIER |
|---------------------------------|-----------------------|------------|
| <b>PLASMID DNA TRANSFECTION</b> |                       |            |
| Transfectin reagent             | Biorad                | 1703352    |
| jetPRIME reagent                | Polyplus-transfection | 114-07     |
| <b>SELECTION MARKER</b>         |                       |            |
| Ampicillin                      | Sigma-Aldrich         | A9518-25G  |
| Hygromycin B                    | Thermo Scientific     | 10687-010  |
| Zeocin                          | Invitrogen            | R25001     |
| <b>KINASE INHIBITORS</b>        |                       |            |
| Vemurafenib PLX4032             | MedChem Express       | HY-12057   |
| PLX8394                         | MedChem Express       | HY-18972   |
| Encorafenib LGX818              | MedChem Express       | HY-15605   |
| Dabrafenib GSK2118436A          | Selleckchem           | S2807      |
| AZ628                           | Selleckchem           | S2746      |
| GDC0879                         | Selleckchem           | S1104      |
| LY3009120                       | Selleckchem           | S7842      |
| TAK632                          | Selleckchem           | S7291      |
| Selumetinib AZD6244             | Selleckchem           | S1008      |
| Refametinib BAY86-9766          | MedChem Express       | HY-102156  |

| CELL LINES                                             | SOURCE     | IDENTIFIER |
|--------------------------------------------------------|------------|------------|
| HEK293                                                 | ATCC       | N/A        |
| SW480                                                  | ATCC       | N/A        |
| A375                                                   | ATCC       | N/A        |
| <b>STABLE CELL LINES</b>                               |            |            |
| SW480 <sup>RBD BRAF-RLucF1, HRAS(G12V)-RLucF2</sup>    | This paper | N/A        |
| SW480 <sup>BRAF-RLucF1, HRAS(G12V)-RLucF2</sup>        | This paper | N/A        |
| SW480 <sup>BRAF(V600E)-RLucF1, HRAS(G12V)-RLucF2</sup> | This paper | N/A        |

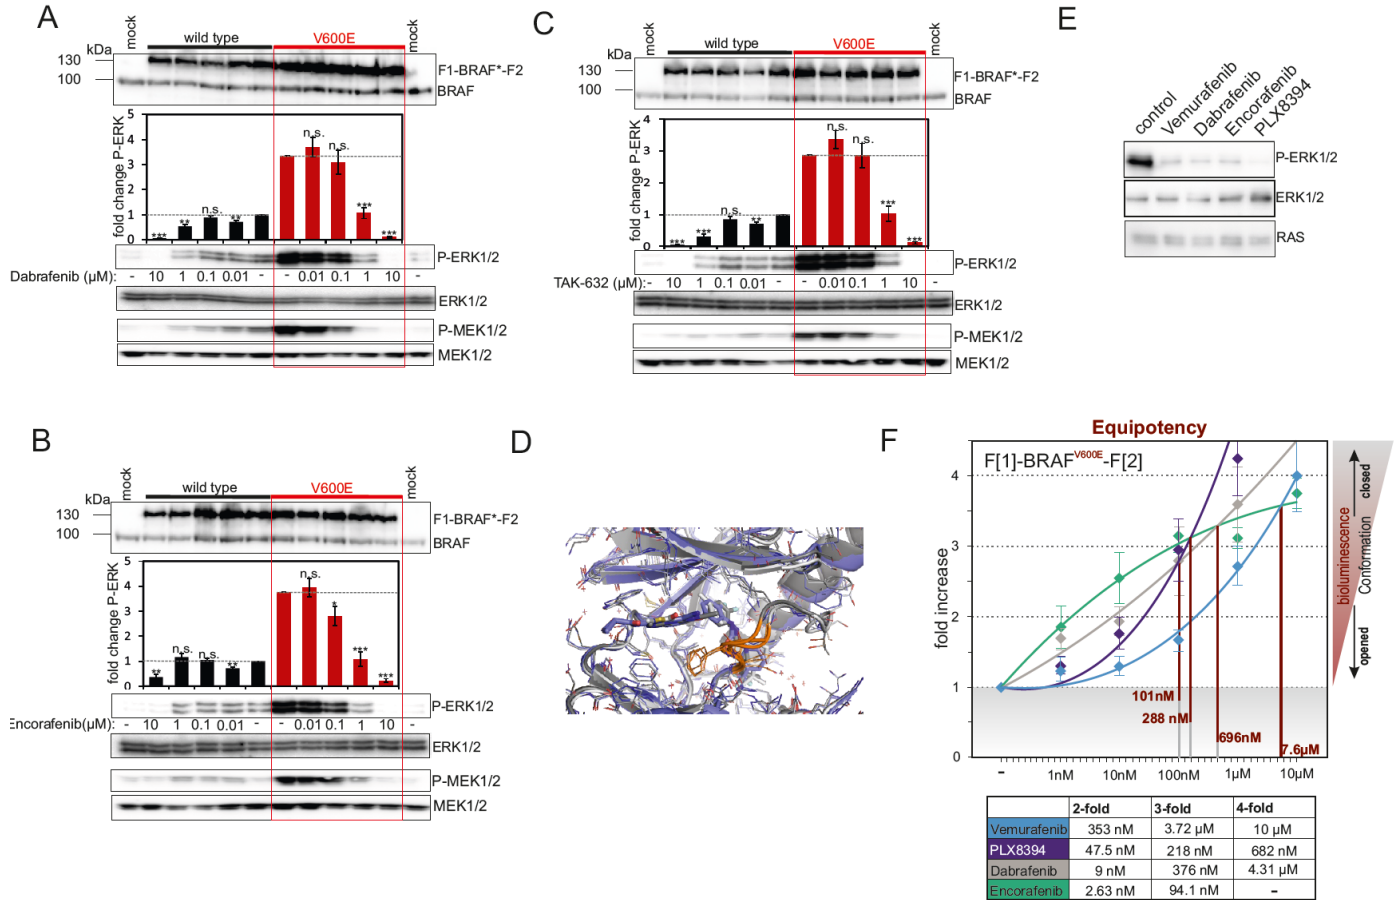

**Fig. S1. BRAF KinCon reporter activities and BRAF profiling.** (A-C) Impact of BRAF KinCon reporter expression (for 48h) and 1h dose-dependent BRAFi inhibitor exposure on ERK1/2 and MEK1/2 phosphorylations ( $\pm$ SEM;  $n=4$  independent experiments). Student's t-test was used to evaluate statistical significance. Confidence level: \* $P<0.05$ , \*\* $P<0.01$ , \*\*\* $P<0.001$ . (D) Shown are the structural binding characteristics of TAK632 (in purple) when compared with LY3009120 and AZ628 (in grey). (E) Impact of 1 $\mu$ M/1h BRAFi exposure on P-ERK signals (representative experiment, A375 melanoma cell line). (F) Impact of indicated BRAFi on the closing of BRAF-V600E KinCon reporters. Data from Figs. 1E and 2A have been used and conformation closing curves have been generated. The dose-dependent effects of vemurafenib, PLX8394, dabrafenib, and encorafenib on the BRAF-V600E KinCon reporters were normalized on the untreated settings. For each BRAFi polynomial regression trend lines are presented. Equi-potencies of pairs of BRAFi are indicated in the graph in red. In the table we list concentrations of equi-potencies for BRAFi for fold-changes of the KinCon conformations.

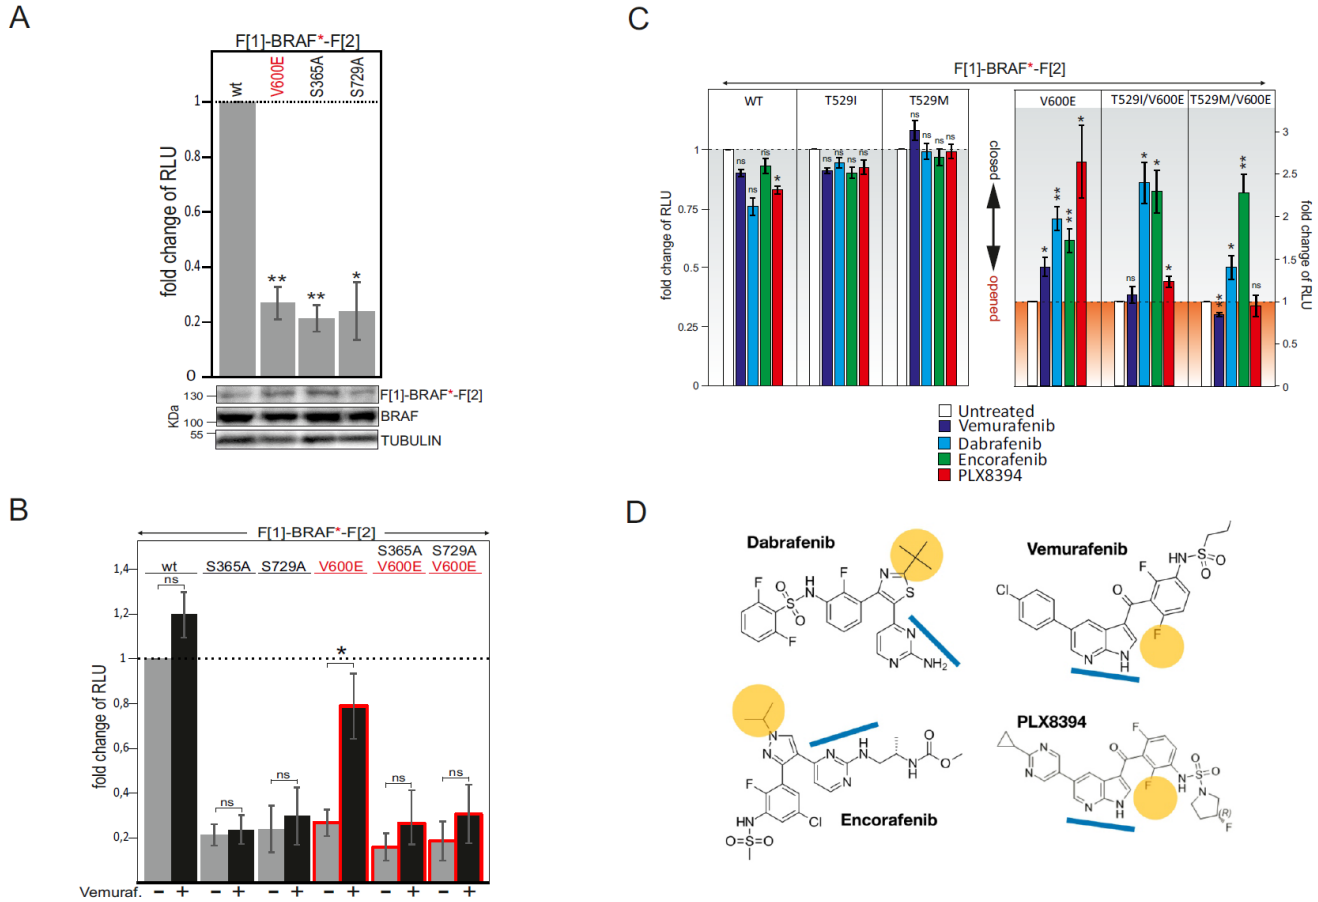

**Fig. S2. Impact of defined kinase mutations on BRAF KinCon reporter dynamics.** (A) Following transient expression of indicated KinCon reporter for 24h, we performed bioluminescence analyses. Quantification is shown from n=4 independent experiments;  $\pm$ SEM. (B) Following transient expression of indicated KinCon reporter for 24h we treated cells for 1 h with  $1\mu\text{M}$  Vemurafenib followed by *Rluc* PCA analyses. Quantification is shown from n=3 independent experiments;  $\pm$ SEM. (C) Shown is the impact of gatekeeper mutations T529M and T529I in combinations with V600E on KinCon reporter dynamics upon BRAFi treatment (1h,  $1\mu\text{M}$ ). Quantification is shown from n=5 independent experiments;  $\pm$ SEM. (D) Comparison of structure features of indicated BRAFi relevant for gatekeeper mutation interactions. The hydrophobic groups are indicated in yellow, the hinge binding motif is indicated as a blue bar. Confidence level: \* $P < 0.05$ , \*\* $P < 0.01$ , \*\*\* $P < 0.001$ .

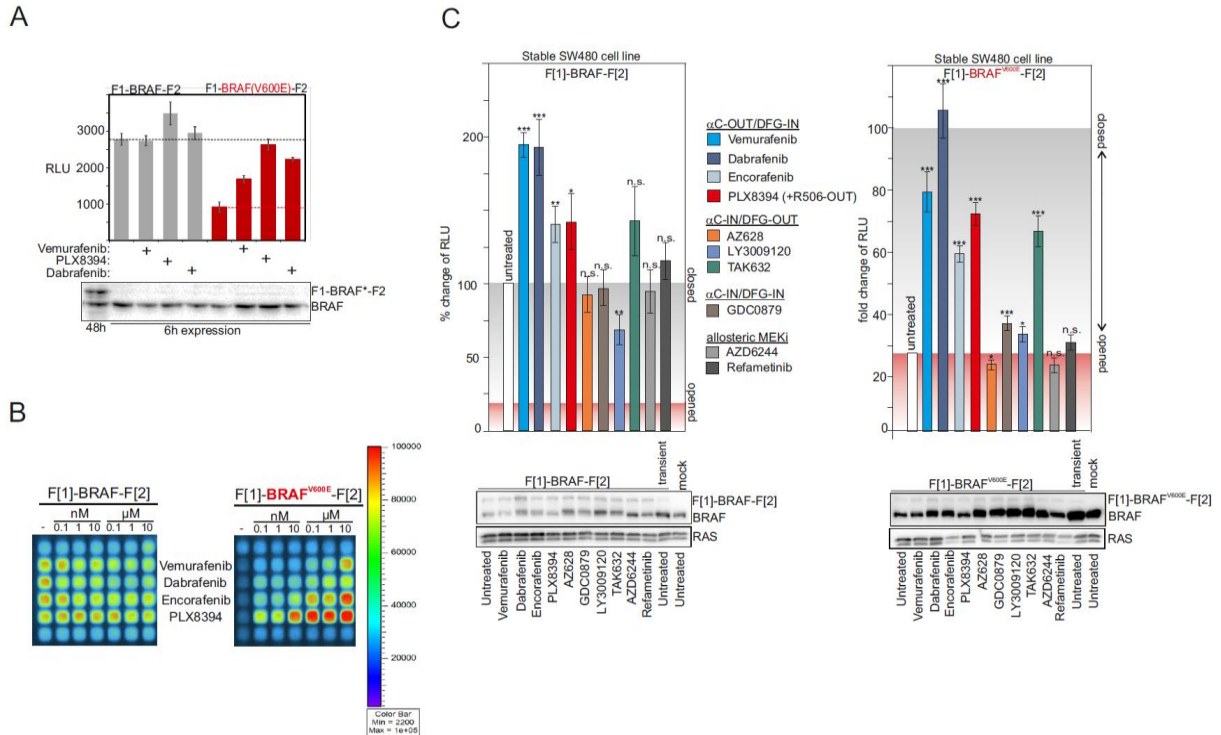

**Fig. S3. BRAF KinCon reporter dynamics.** (A) Following transient expression of indicated KinCon reporter for 6h and 24h we treated HEK293 cells with indicated BRAFi (1  $\mu$ M; 1h). Shown is a representative experiment of  $n=3$ . (B) Bioluminescence imaging of detached HEK293 cells expressing indicated KinCon reporters in sections of a 1536-well plate (pseudo-color scaling of emitted RLU). (C) Impact of indicated BRAFi and MEKi on shown BRAF KinCon reporters stably expressed in SW480 cells ( $\pm$ SEM;  $n=5$  independent experiments). Bioluminescence signals have been normalized to the reporter expression levels (ratios of endogenous BRAF/reporter; the BRAF<sup>V600E</sup> KinCon reporter signals are  $\sim$  28% when compared to the wild type).

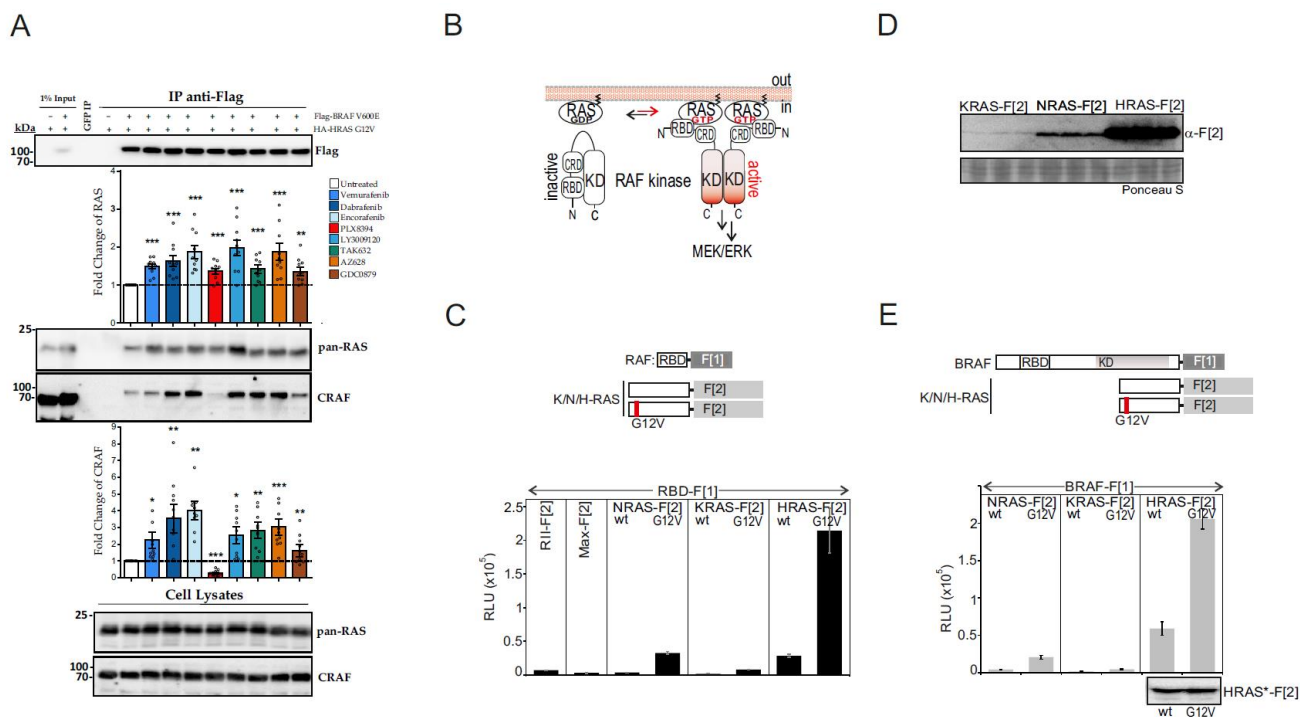

**Fig. S4. Complex formation of RAS:BRAF and PPI reporter dynamics.** (A) Shown are immunoprecipitations of transiently overexpressed flag-BRAF<sup>V600E</sup> and HA-HRAS<sup>G12V</sup> using flag-tag antibodies from HEK293 cells following 1h RAFi exposure (quantification is shown from n=10 independent experiments; ±SEM). (B) GDP/GTP exchange affects RAS:RAF complex formation and downstream signaling; RAS binding domain (RBD), Cysteine rich domain (CRD), kinase domain (KD). (C) Following co-expression of pairs of either full-length RAS isoforms/mutants, Max, and RII with the RAS binding domain (RBD) tagged with indicated *Rluc* PCA fragments we determined bioluminescence signals (RLU) using the *Rluc*-PCA as read out (±SD; representative of n=3). (D) Immunoblotting indicates differences of expression levels of indicated RAS isoforms tagged with *Rluc* PCA -F[2]. (E) Following co-expression of *Rluc*-PCA fragment tagged pairs of RAS isoforms/mutants and full length BRAF we determined GTP-dependent PPIs (±SD; representative experiment of n=3 independent experiments). Student's t-test was used to evaluate statistical significance. Confidence level: \*P<0.05, \*\*P<0.01, \*\*\*P<0.001.



A

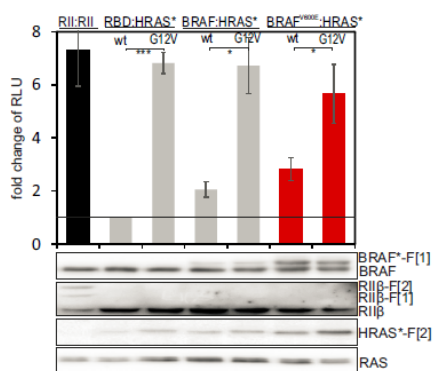

B

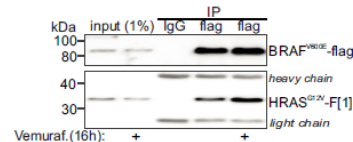

C

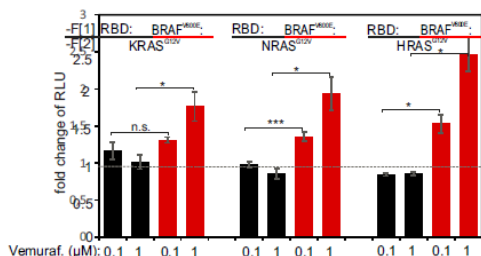

D

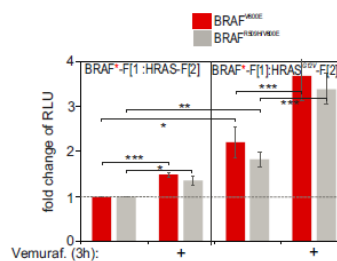

**Fig. S5. Impact of vemurafenib on indicated PPIs.** (A) Following co-expression of indicated *Rluc*-PCA fragment tagged pairs in HEK293 cells PPI values have been determined ( $\pm$ SEM from  $n=4$  independent experiments). (B) Co-immunoprecipitation of flag-tagged BRAF-V600E and HRASG12V-F[1] transiently expressed in HEK293 cells following treatments with vemurafenib (10  $\mu$ M, 16h; representative of  $n=3$ ). (C) Following co-expression of PPI reporter combinations of BRAF, RBD, H-, N-, and K-RAS we treated cells with increasing vemurafenib concentrations (0.1 and 1  $\mu$ M). Shown is the PPI analyses of  $n=3$  independent experiments (HEK293,  $\pm$ SEM; normalized either on 0,1 and/or 1  $\mu$ M Vemurafenib treatment of RBD:RAS interactions). (D) Following integration of the R509H mutation (impairs RAF dimerization) into the PPI reporter construct BRAF-V600E we analyzed the effect of vemurafenib treatment on complex formation (1  $\mu$ M, 3h,  $n=4$  ind. experiments;  $\pm$ SEM; HEK293). Student's t-test was used to evaluate statistical significance. Confidence level: \* $P<0.05$ , \*\* $P<0.01$ , \*\*\* $P<0.001$ .

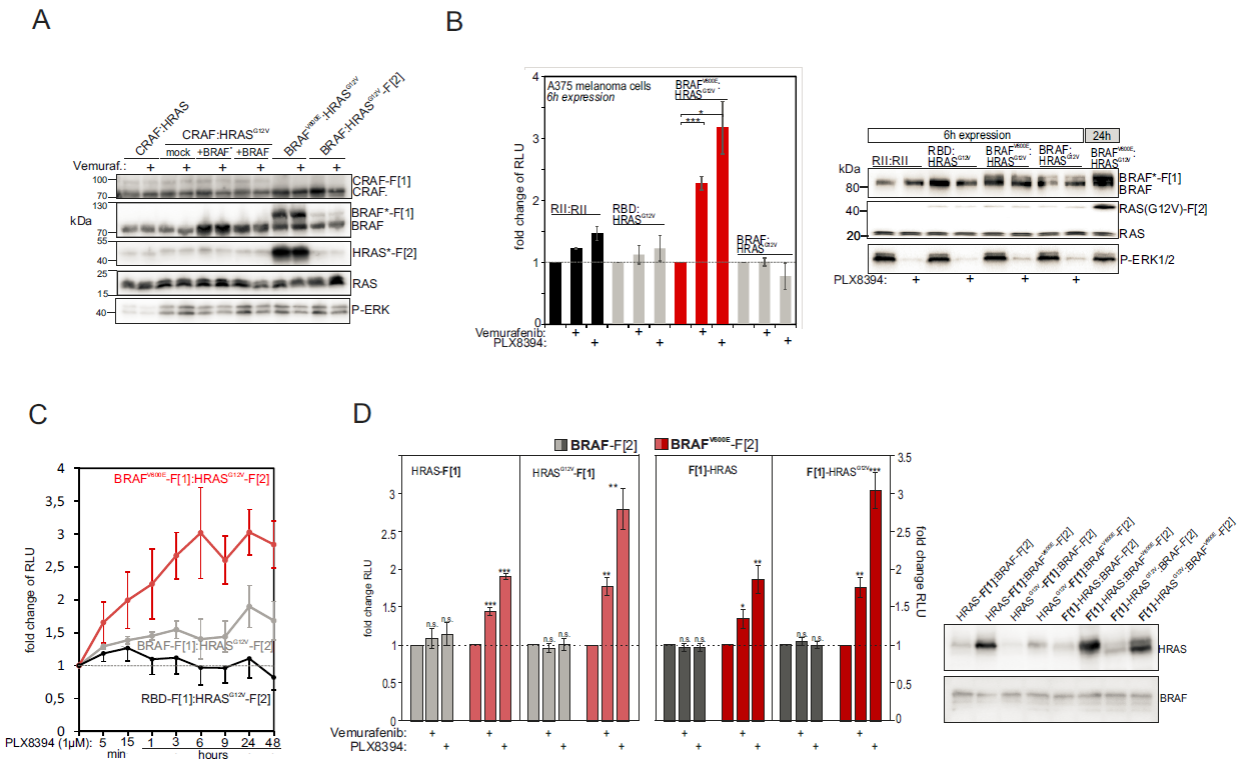

**Fig. S6. Impact of BRAFi on binary RAS:RAF interactions.** (A) representative expression analyses of PPI reporter as shown in Fig. 5C. (B) Following coexpression of indicated PPI reporters for 6 h and 24 h we treated A375 cells with PLX8394 and vemurafenib (1  $\mu$ M; 3h). Shown are the PPI analyses of n=3 independent experiments ( $\pm$ SEM). (C) Time-dependent effects of PLX8394 exposure (1  $\mu$ M) on the bioluminescence of SW480 cells stably expressing indicated PPI reporter pairs (n=4 ind. experiments,  $\pm$ SEM). (D) Impact of vemurafenib or PLX8394 exposure (3h, 1  $\mu$ M) on N or C terminal tagged HRAS Rluc-PCA PPI reporter (n=4 ind. experiments,  $\pm$ SEM). Student's t-test was used to evaluate statistical significance. Confidence level: \*P<0.05, \*\*P<0.01, \*\*\*P<0.001.

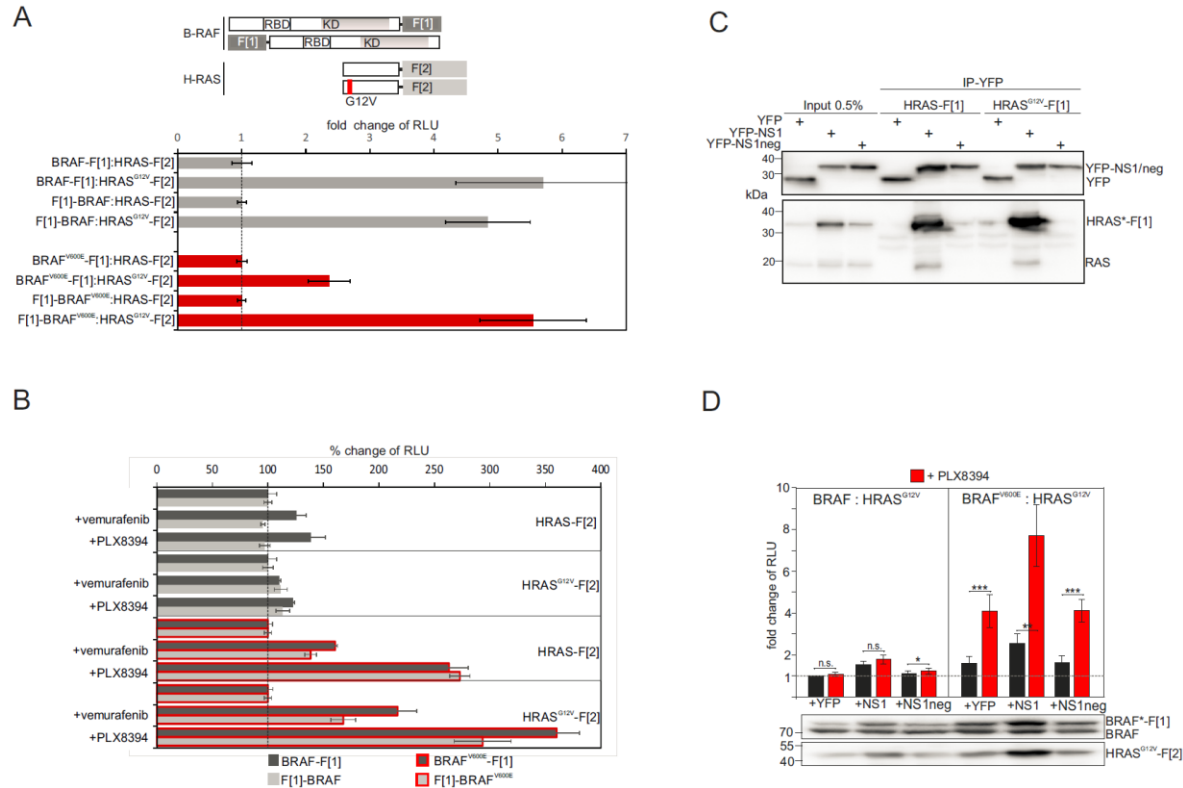

**Fig. S7. PPI reporter dynamics and NS1 monobody IPs.** (A) Schematic depiction of the PPI reporter constructs. Impact of the G12V mutation in HRAS on the binary interaction with either N- or C-terminally tagged BRAF using the Rluc-PCA PPI reporter as read out (n=4 experiments,  $\pm$ SD). (B) Impact of vemurafenib or PLX8394 exposure (3h, 1  $\mu$ M) on indicated PPI reporter interactions (n=4 ind. experiments,  $\pm$ SEM). (C) Shown are representative co-IP (of n=3 ind. exp.) of YFP or YFP-tagged hybrid proteins with endogenous RAS and Rluc-PCA tagged HRAS. (D) PPI reporter analyses of transiently expressed reporter protein pairs following 3h treatment with PLX8394. Quantifications from n=5 independent experiments are shown ( $\pm$ SEM).

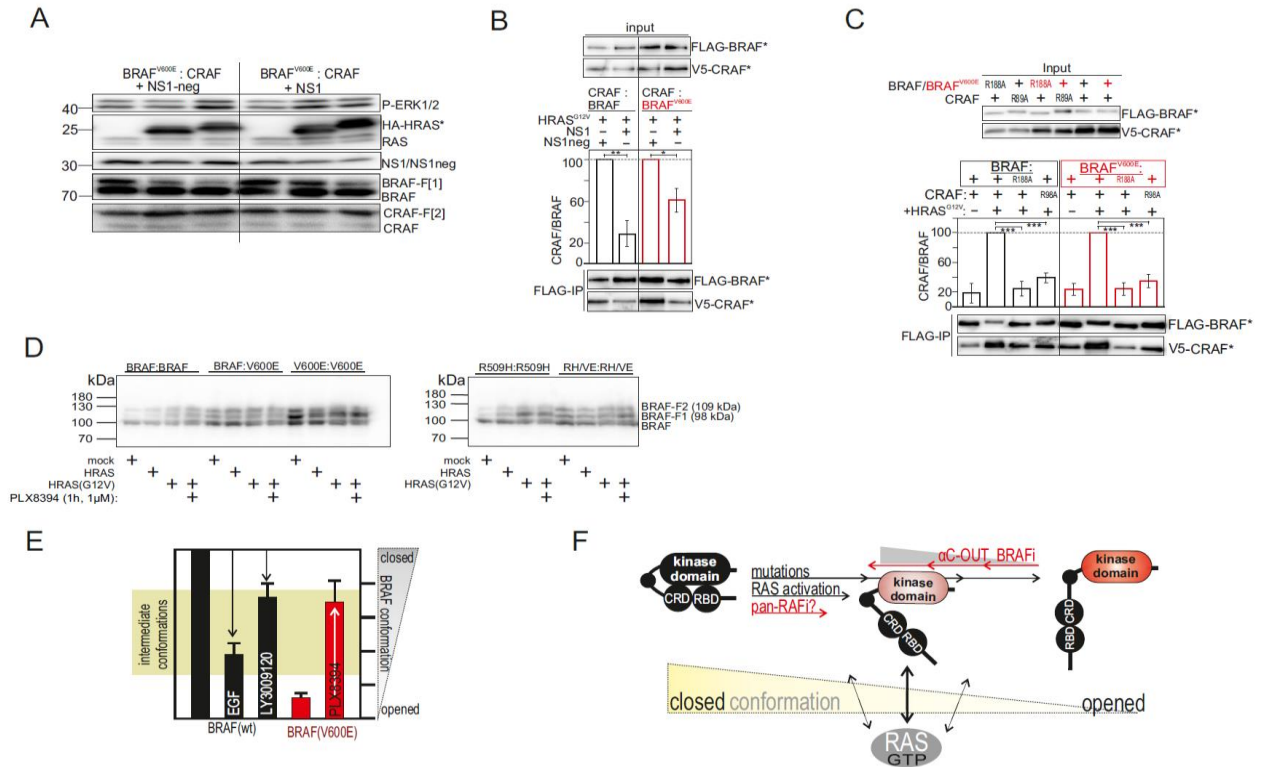

**Fig. S8. Validation of PPI dynamics and impact of RAFi on RAF conformations.** (A) Representative expression profiling of PPI reporter hybrid proteins following coexpression of NS1, NS1neg, and HRAS variants as shown in Fig. 6C. (B) IPs of indicated RAF variants from HEK293 cells are shown. Representative IP of n=4 independent experiments are shown ( $\pm$ SEM). (C) IPs of indicated RAF mutants from HEK293 cells. Representative IP of n=4 independent experiments are shown ( $\pm$ SD). (D) Representative expression profiling of PPI reporter hybrid proteins as presented in Fig. 6E. (E) Shown are the effects of EGF activation, V600E mutations, and BRAFi exposure on the formation of intermediate BRAF conformations. Data have been extracted from Fig. 1. (F) Detailed depiction of (1) and (2) from Fig. 6G (RAF dimer formation has been neglected). RAS-activation, dose-dependent BRAFi engagements (triangle;  $\alpha$ C-OUT BRAFi and probably some pan-BRAFi), and BRAF mutations (class I, II or III) may have the potential to convert BRAF to intermediate kinase conformations showing elevated affinities for GTP-loaded RAS.
